# Supplementary material for: Skin and gut microbiomes of a wild mammal respond to different environmental cues
Source: PubMed Central journal article supplement (PMC6258405; doi:10.1186/s40168-018-0595-0), 2018-11-26

PCoA 2 (7.17% variation explained)

0.2  
0.1  
0.0  
-0.1  
-0.2

-0.25

0.00

0.25

0.50

PCoA 1 (18.9% variation explained)

Study area

● CH

● CL

● KL

Host Sex

● Female

▲ Male

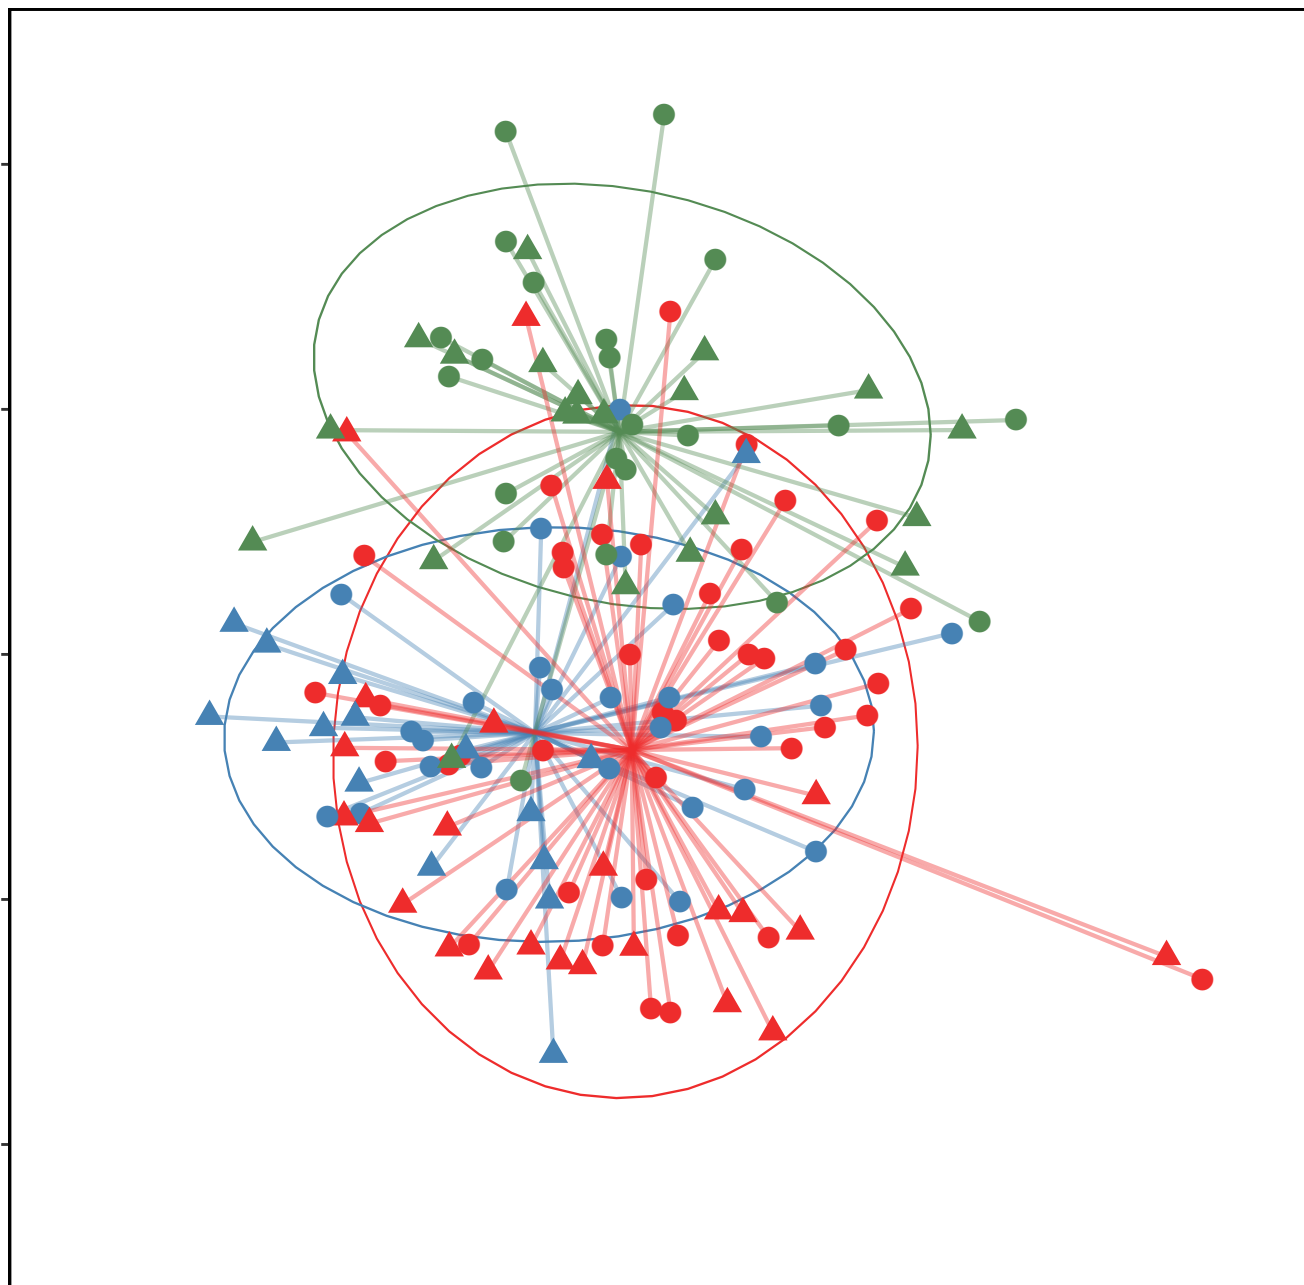

Supplement: 40168_2018_595_MOESM9_ESM.pdf [file 40168_2018_595_MOESM9_ESM.pdf]
