# Supplementary material for: Skin and gut microbiomes of a wild mammal respond to different environmental cues
Source: PubMed Central journal article supplement (PMC6258405; doi:10.1186/s40168-018-0595-0), 2018-11-26

# Gut vs Skin microbiome

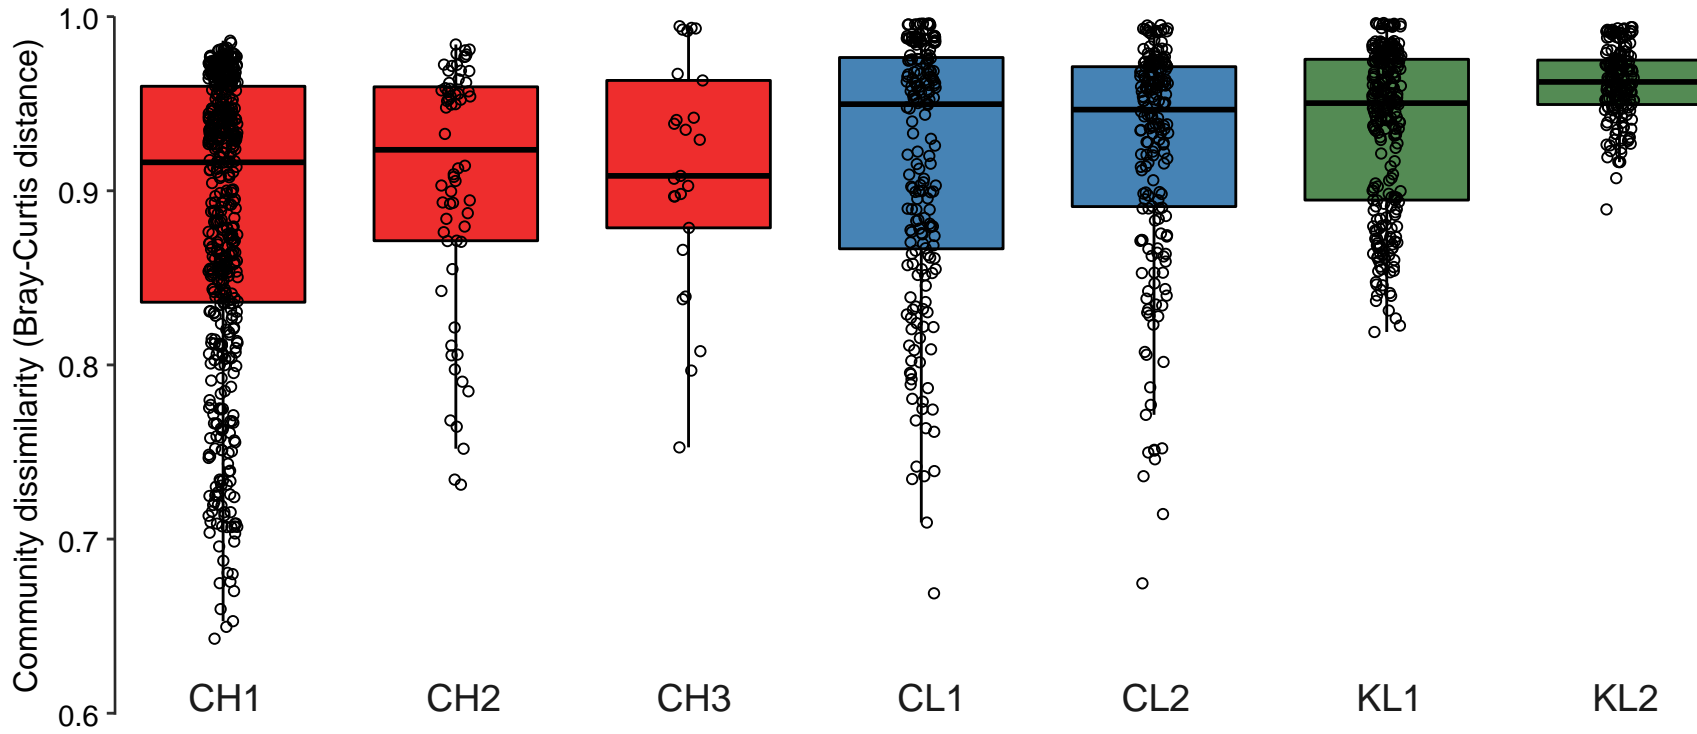

Supplement: 40168_2018_595_MOESM13_ESM.pdf [file 40168_2018_595_MOESM13_ESM.pdf]
